# Supplementary material
Source: publisher figshare collection journal article supplement (https://aacr.figshare.com/articles/dataset/_/23560957)
Supplement: Supplementary file 1 [file 41334763]

## Supplemental Information

### **Wnt signaling stimulates cooperation between GREB1 and HNF4 $\alpha$ to promote proliferation in hepatocellular carcinoma**

Shinji Matsumoto, Akikazu Harada, Minami Seta, Masayuki Akita, Hidetoshi Gon, Takumi Fukumoto, Akira Kikuchi

Supplementary Methods.

Supplementary References.

Supplemental Figures 1-8 and associated legends.

Supplemental Tables 1-10.

## **Supplementary Methods**

### **Immunohistochemical analysis**

Tissue microarrays (TMAs) were constructed from formalin-fixed paraffin-embedded (FFPE) tumor tissue for immunohistochemistry. Three 2-mm tissue cores were randomly taken from each case. Antigen retrieval was performed using a decloaking chamber (Biocare Medical, Walnut Creek, CA, USA). Endogenous peroxidase activity was blocked using Dako REAL™ Peroxidase Blocking Solution (Dako, Carpinteria, CA, USA) for 15 min. The sections were then incubated with Blocking One Histo (NACALAI, Kyoto, Japan) for 15 min to block nonspecific antibody binding sites. Tissue specimens were incubated with primary antibodies for 2 h at room temperature and then with HRP Horse Anti-Mouse IgG (Vector Laboratories, Burlingame, CA, USA) for 1 h. Staining was visualized using diaminobenzidine (Nichirei Biosciences, Tokyo, Japan) as the chromogen. Tissue sections were counterstained with 0.1% (w/v) hematoxylin.

For subsequent double staining, tissue specimens were treated with antibody stripping buffer (10 mM sodium citrate [pH 6.0]) at 95°C for 5 min using a decloaking chamber. Tissue specimens were incubated with mouse anti- $\beta$ -catenin (1:100) antibody for 1 h at room temperature, followed by AP Horse Anti-Mouse IgG (Vector Laboratories, Burlingame, CA, USA) for 1 h. Staining was detected using the Warp Red Chromogen Kit (Biocare Medical, Walnut Creek, CA, USA). Tissue sections were counterstained with 0.1% (w/v) hematoxylin. Tumors were considered  $\beta$ -catenin or GREB1 positive if > 30% of the total area of a tumor lesion was stained. Two investigators assessed the sections independently in a blinded fashion.

### **Identification of general Wnt signaling target genes**

In order to search for general Wnt target genes, correlation of gene expression with AXIN2 in each of 33

TCGA tumors were calculated. AXIN2 was chosen as the most established general Wnt target gene because its expression is widely used as a reporter for various tissues (1, 2). For each gene, the number of tumors where the gene expression correlates significantly ( $R > 0.5$ ,  $p < 0.05$ ) with AXIN2 were counted. As shown in Supplemental Table. 1, these genes were sorted in descending order by the count, and the top 10 genes which have previously been presented as Wnt target gene were defined as general Wnt target genes (3-13).

### **Knockdown of protein expression by siRNA or ASO**

The siRNA and ASO sequences used in this study are shown in Supplemental Material 2. Hep3B, JHH7, and Huh7 cells were transfected with the siRNA (10-20 nM) or ASO (10-20 nM) against the genes of interest using RNAiMAX (Thermo Fisher Scientific, Waltham, MA, USA). The transfected cells were used for experiments 48–72 h post-transfection.

### **Plasmid construction and generation of stable transfectants**

Standard recombinant DNA techniques were used to generate plasmids harboring full-length GREB1 or dominant negative (DN)-TCF4. Lentiviral vectors were constructed by subcloning EGFP-GREB1 or EGFP-DN-TCF4 into CSII-CMV-MCS-IRES2-Bsd, kindly provided by Dr. H. Miyoshi (RIKEN BioResource Center, Ibaraki, Japan) (14). CS-RfA-EVBsd containing stem-loop cassettes encoding shRNAs targeted to scramble (targeting sequence: CAGTCGCGTTTGCGACTGG) for control, human GREB1 (targeting sequence 5029: GTCACGAACATGGGCTCTTTA, 6839: GGTAATACCCTACCTCTTAG), human HNF4 $\alpha$  (targeting sequence 1190: CGAGCAGATCCAGTTCATCAA, 1882: ATGACTTGAGGCCTTACTTAA), and human FOXA2 (targeting sequence 249: GGGTGATTGCTGGTCGTTTGT, 2233: GGTCTCGGGTCCGATTAAT) were

used for shRNA. Plasmids were transfected with packaging vectors, pMD2.G and psPAX2, into X293T cells using Lipofectamine 3000 transfection reagent (Thermo Fisher Scientific, Waltham, MA, USA) to generate lentiviruses. To generate Hep3B cells stably expressing GFP-DN-TCF4, PLC/PRF/5 cells stably expressing GFP-GREB1, or Hep3B and JHH7 cells stably expressing control or GREB1 shRNA, parental cells ( $1 \times 10^5$ /well) were plated in 12-well plates and transduced with lentiviruses and 10  $\mu$ g/ml polybrene. After the infection, the cells were centrifuged at  $1200 \times g$  for 30 min and then incubated for 24 h.

### **Quantitative RT-PCR**

Total RNA (1  $\mu$ g) was reverse transcribed using ReverTra Ace qPCR RT Master Mix (TOYOBO, Osaka, Japan). Quantitative RT-PCR was performed as previously described (15). The primers used for quantitative RT-PCR are listed in Supplemental Material 3.

### **RNA-seq data analysis**

Sequenced reads were preprocessed by Trim Galore! v0.6.7 and quantified by Salmon v1.4.0 with the flags gcBias and validateMappings. GENCODE v36 (GRCh38.p13) annotation was used as the transcript reference. All procedures were implemented using the RNA-seq pipeline ikra v2.0.1 [<http://doi.org/10.5281/zenodo.4718200>] with default parameters. The quantified transcript-level scaled TPM was summarized into a gene-level scaled TPM using tximport v1.22.0. Downstream analysis was conducted using iDEP.951 [<http://bioinformatics.sdstate.edu/idep/>]. Low expression genes that had less than 0.5 counts per million (CPM) in at least one sample were filtered. Differential expression analysis with DESeq2 was performed in iDEP using the default parameters (false discovery rate < 0.1). The signature score was defined as the mean z-score of the z-score transformed data.

## **Gene Set Enrichment Analysis (GSEA)**

Filtering of low expression genes was performed as described in the "RNA-seq data analysis" section. Normalization was conducted using DESeq2, and the normalized counts were used as the input data. FDR cutoff was set to 0.01. GSEA was conducted using GSEAPy v0.10.7, and hallmark gene sets from the Molecular Signatures Database (MSigDB) were used.

## **Single-cell RNA-seq data analysis**

The GSE151530 dataset consisted of 46 liver tumor samples from 37 patients. Malignant cells (17164 cells) that were already defined in previous studies (16) were extracted from the total cells, and 13187 cells, including 20 HCC and ten intrahepatic cholangiocarcinoma samples, met the quality control metrics as follows: doublets detected using Scrublet v0.2.1, cells with a high percentage of counts in the mitochondrial genes ( $\geq 15\%$ ), cells that had less than 200 genes expressed. Genes that were detected in less than three cells were filtered out. Pre-processing was conducted by `sc.pp.normalize total` (`target_sum = 1e4`) and `sc.pp.log1p` implemented in Scanpy. Batch-effect correction was performed using the BBKNN algorithm. UMAP was used for dimensionality reduction. Scanpy v1.6.0 and python 3.7.8 were used to analyze and visualize data.

## **Generation of knockout cells**

To establish GREB1 or GREB1 enhancer (En1) knockout cells, plasmid pRP [CRISPR] expressing hCas9 and guide RNA were designed and synthesized by VectorBuilder Inc. (Guangzhou, China). The target sequences for human GREB1 and GREB1 enhancer (En1) were as follows: human GREB1, 5'-TAAAGCCGATGGTCGCGGCA -3'; En1-5', 5'-AAAGATCATTCTCGTAGCAC-3'; En1-3', 5'-CATCAGTCTCTTTTGTCTG-3'. The plasmid pRP [CRISPR] with the gRNA sequences was

introduced into Hep3B or JHH7 cells, and then single colonies were picked, mechanically disaggregated, and replated into the individual wells of 24-well plates.

### **Colony formation assay**

Hep3B or JHH7 cells (5000 cells) were seeded into 100-mm dishes and cultured for 10–14 days in 10% serum culture medium. The cells were fixed with 4% PFA for 10 min, and the colonies were stained with 0.2% crystal violet for 5 min. The areas of the colonies were measured using Image Pro software (Media Cybernetics, Silver Spring, MD, USA).

### **Cell proliferation assay**

Cells ( $2.0 \times 10^4$ /ml) were transfected with the indicated siRNA. Four days after plating, the medium was replaced with 10% serum culture medium. The cells were counted every 48 h for eight days. The assay was performed in triplicate for each experiment. CyQUANT NF assays (Life Technologies/Thermo Fisher Scientific, Waltham, MA, USA) were performed according to the manufacturer's instructions. Fluorescence was measured using a Synergy HTX Multi-Mode Microplate Reader (BioTek, Winooski, VT, USA).

### **Subcutaneous xenografts**

Male BALB/cAJcl-nu/nu mice (6-8 weeks old; CLEA Japan, Tokyo, Japan) were subcutaneously injected dorsally with Hep3B or JHH7 cells ( $1 \times 10^7$  cells) resuspended in 150  $\mu$ l of Matrigel (Corning, NY, USA) or PLC/PRF5 cells ( $5 \times 10^6$  cells) resuspended in 100  $\mu$ l of 3D Ready Atelocollagen (Koken Inc., Tokyo, Japan), and euthanized 15, 46, 35 days after inoculation, respectively. Tumor tissue was harvested, and the tumors were measured and weighed.

## Supplementary References

1. Lustig B, Jerchow B, Sachs M, Weiler S, Pietsch T, Karsten U, *et al.* Negative feedback loop of Wnt signaling through upregulation of conductin/axin2 in colorectal and liver tumors. *Mol Cell Biol* 2002; 22: 1184-93.
2. Jho EH, Zhang T, Domon C, Joo CK, Freund JN, Costantini F. Wnt/ $\beta$ -catenin/Tcf signaling induces the transcription of Axin2, a negative regulator of the signaling pathway. *Mol Cell Biol* 2002; 22: 1172-83.
3. Weidinger G, Thorpe CJ, Wuennenberg-Stapleton K, Ngai J, Moon RT. The Sp1-related transcription factors sp5 and sp5-like act downstream of Wnt/ $\beta$ -catenin signaling in mesoderm and neuroectoderm patterning. *Curr Biol* 2005; 15: 489-500.
4. Kakugawa S, Langton PF, Zebisch M, Howell S, Chang TH, Liu Y, *et al.* Notum deacylates Wnt proteins to suppress signalling activity. *Nature* 2015; 519: 187-92.
5. Takahashi N, Yamaguchi K, Ikenoue T, Fujii T, Furukawa Y. Identification of two Wnt-responsive elements in the intron of RING finger protein 43 (RNF43) gene. *PLoS One* 2014; 9: e86582.
6. Wharton KA, Jr., Zimmermann G, Rousset R, Scott MP. Vertebrate proteins related to *Drosophila* Naked Cuticle bind Dishevelled and antagonize Wnt signaling. *Dev Biol* 2001; 234: 93-106.
7. Kim JS, Crooks H, Dracheva T, Nishanian TG, Singh B, Jen J, *et al.* Oncogenic  $\beta$ -catenin is required for bone morphogenetic protein 4 expression in human cancer cells. *Cancer Res* 2002; 62: 2744-48.
8. Sekiya T, Adachi S, Kohu K, Yamada T, Higuchi O, Furukawa Y, *et al.* Identification of BMP and activin membrane-bound inhibitor (BAMBI), an inhibitor of transforming growth factor- $\beta$  signaling, as a target of the  $\beta$ -catenin pathway in colorectal tumor cells. *J Biol Chem* 2004; 279: 6840-46.
9. Takahashi M, Fujita M, Furukawa Y, Hamamoto R, Shimokawa T, Miwa N, *et al.* Isolation of a novel human gene, APCDD1, as a direct target of the  $\beta$ -catenin/T-cell factor 4 complex with probable involvement in colorectal carcinogenesis. *Cancer Res* 2002; 62: 5651-56.
10. Pendas-Franco N, Garcia JM, Pena C, Valle N, Palmer HG, Heinaniemi M, *et al.* DICKKOPF-4 is induced by TCF/ $\beta$ -catenin and upregulated in human colon cancer, promotes tumour cell invasion and angiogenesis and is repressed by  $1\alpha,25$ -dihydroxyvitamin D3. *Oncogene* 2008; 27: 4467-77.
11. Qiu W, Hu Y, Andersen TE, Jafari A, Li N, Chen W, *et al.* Tumor necrosis factor receptor

superfamily member 19 (TNFRSF19) regulates differentiation fate of human mesenchymal (stromal) stem cells through canonical Wnt signaling and C/EBP. *J Biol Chem* 2010; 285: 14438-49.

12. Zhai Y, Iura A, Yeasmin S, Wiese AB, Wu R, Feng Y, *et al.* MSX2 is an oncogenic downstream target of activated WNT signaling in ovarian endometrioid adenocarcinoma. *Oncogene* 2011; 30: 4152-62.
13. Zhu Y, Wang W, Wang X. Roles of transcriptional factor 7 in production of inflammatory factors for lung diseases. *J Transl Med* 2015; 13: 273.
14. Miyoshi H, Blomer U, Takahashi M, Gage FH, Verma IM. Development of a self-inactivating lentivirus vector. *J Virol* 1998; 72: 8150-57.
15. Hino S, Tanji C, Nakayama KI, Kikuchi A. Phosphorylation of  $\beta$ -catenin by cyclic AMP-dependent protein kinase stabilizes  $\beta$ -catenin through inhibition of its ubiquitination. *Mol Cell Biol* 2005; 25: 9063-72.
16. Ma L, Wang L, Khatib SA, Chang CW, Heinrich S, Dominguez DA, *et al.* Single-cell atlas of tumor cell evolution in response to therapy in hepatocellular carcinoma and intrahepatic cholangiocarcinoma. *J Hepatol* 2021; 75: 1397-408.



# Matsumoto et al., Supplemental Figure 1

**A**

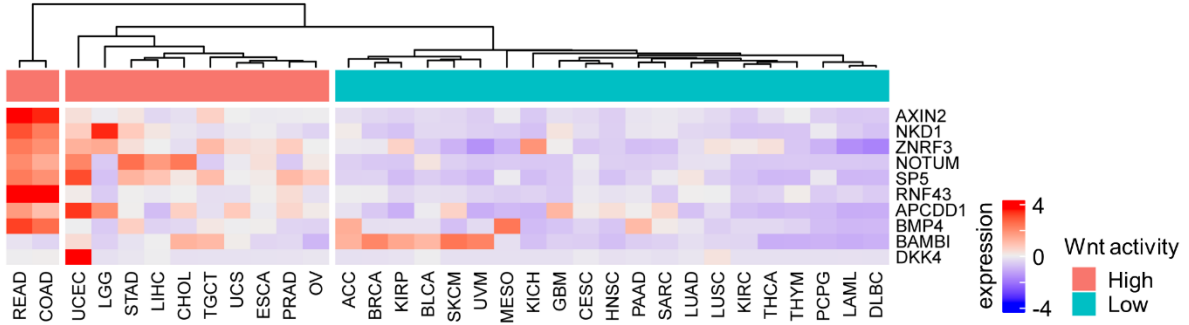

**B**

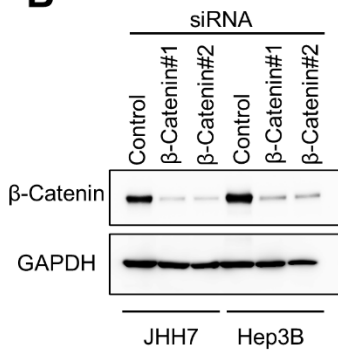

**C**

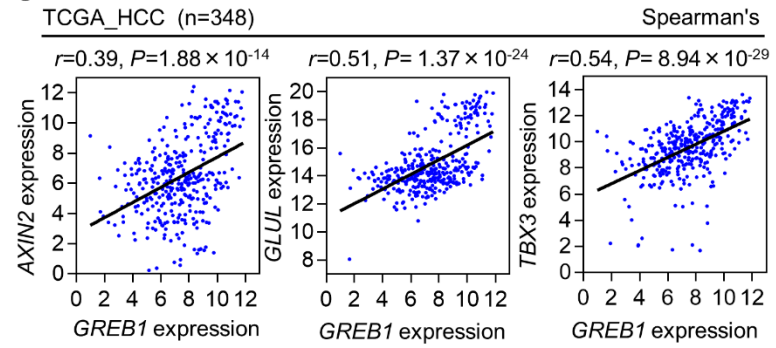

**D**

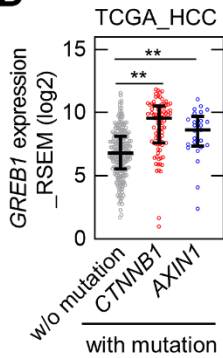

**E**

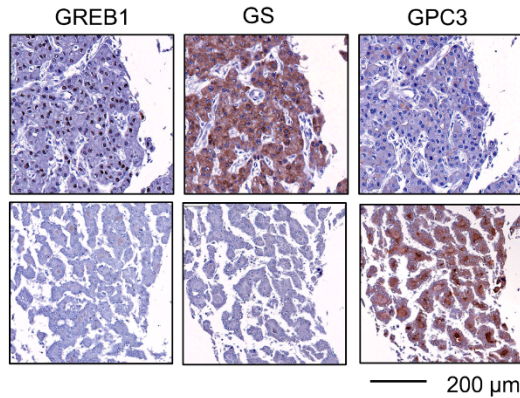

|        | GS+ | GS- |
|--------|-----|-----|
| GREB1+ | 22  | 5   |
| GREB1- | 3   | 30  |

Chi-square:  $P < 0.0001$

|        | GPC3+ | GPC3- |
|--------|-------|-------|
| GREB1+ | 4     | 23    |
| GREB1- | 10    | 23    |

Chi-square:  $P = 0.152$

**F**

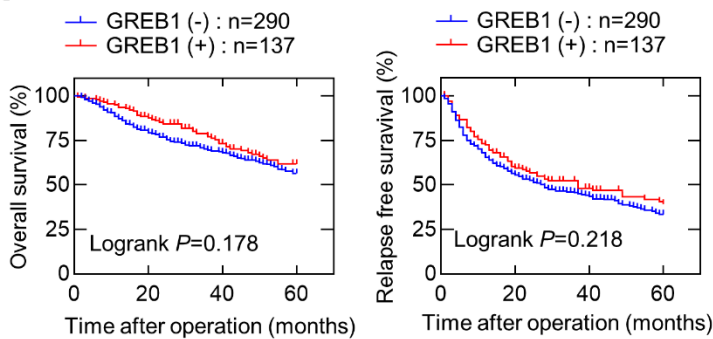

### Supplemental Figure 1| Activation of Wnt signaling and expression of GREB1 in HCC

(A) Heatmap of mean expression value for general Wnt target genes across 33 cancers from TCGA is shown. General Wnt signaling target genes were defined as described in Supplemental Table 1. Z-score was calculated for each row (gene), and k-mean clustering ( $k = 3$ ) was performed on cancers. Clustered cancer groups were divided into two groups, Wnt high activity and low activity cancers.

(B) JHH7 and Hep3B cells were transfected with control or two independent  $\beta$ -catenin siRNAs and the lysates were probed with the indicated antibodies. GAPDH was used as a loading control.

(C) Scatter plots showing the correlation between the expression of Wnt signaling target genes (y-axis) and *GREB1* gene expression (x-axis) in the liver tumors were obtained from a TCGA HCC patient dataset ( $n = 348$ ). The Spearman  $r$ - and  $P$ -values were calculated with GraphPad Prism.

(D) Scatter plots showing *GREB1* expression in patients without mutations in the *CTNNB1* or *AXIN1* gene (234 patients) and those with driver mutations in the *CTNNB1* (89 patients) or *AXIN1* (25 patients) gene were obtained from a TCGA HCC patient dataset using the cBioPortal platform. The  $P$ -values were calculated using the Mann-Whitney test. w/o; without.

(E) HCC specimens ( $n = 60$ ) were stained with anti-GREB1, anti-GS, and anti-GPC3 antibodies and counterstained with hematoxylin (left panel). The contingency table for the number of positive and negative cases for each of GREB1 and GS or GREB1 and GPC3 is shown in the right panel. Scale bar, 200  $\mu\text{m}$ .

(F) The relationship between overall or relapse-free survival and GREB1 mRNA expression in HCC patients was analyzed. The log-rank test is used for statistical analysis.

## Matsumoto et al., Supplemental Figure 2

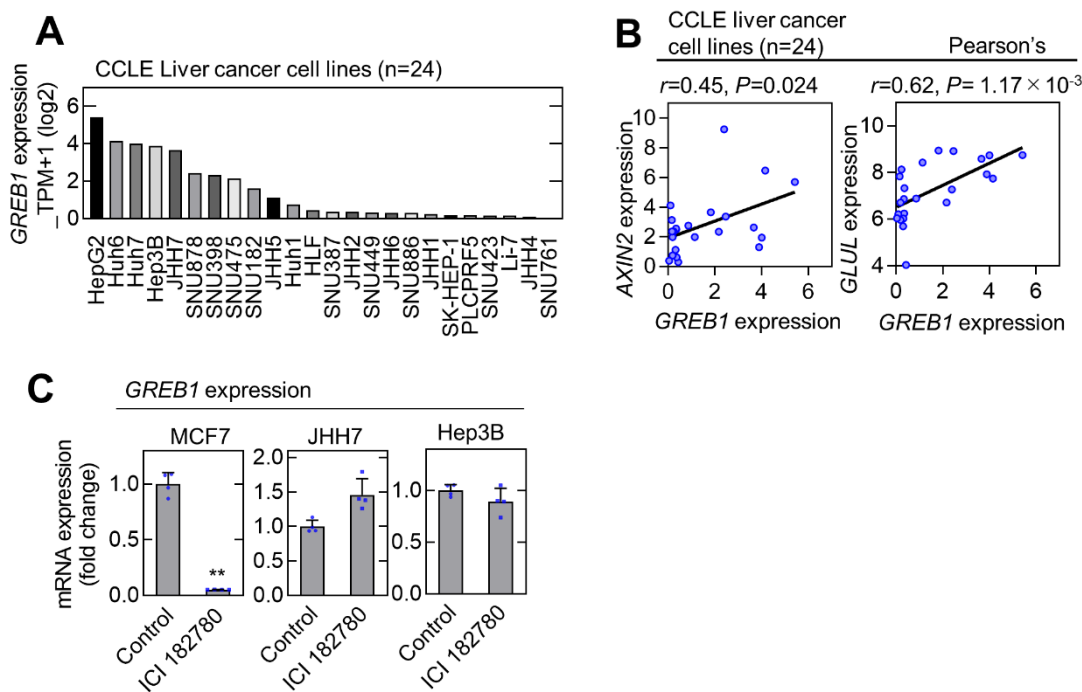

### Supplemental Figure 2| *GREB1* expression in HCC cell lines

(A) *GREB1* mRNA expression levels in 24 hepatocellular carcinoma cell lines. The expression data were obtained from the CCLE (<https://depmap.org/portal/>).

(B) Scatter plots showing the correlation between the expression of the target genes of Wnt signaling (y-axis) and the *GREB1* gene (x-axis) were obtained from the CCLE (n = 24). The Pearson *r*- and *P*-values were calculated with GraphPad Prism.

(C) MCF7, JHH7, or Hep3B cells were treated with 10  $\mu$ M ICI 182780 for 48 hours, then RNA was extracted and *GREB1* mRNA levels were measured using real-time PCR (\*\*,  $P < 0.01$ , t-test).

# Matsumoto et al., Supplemental Figure 3

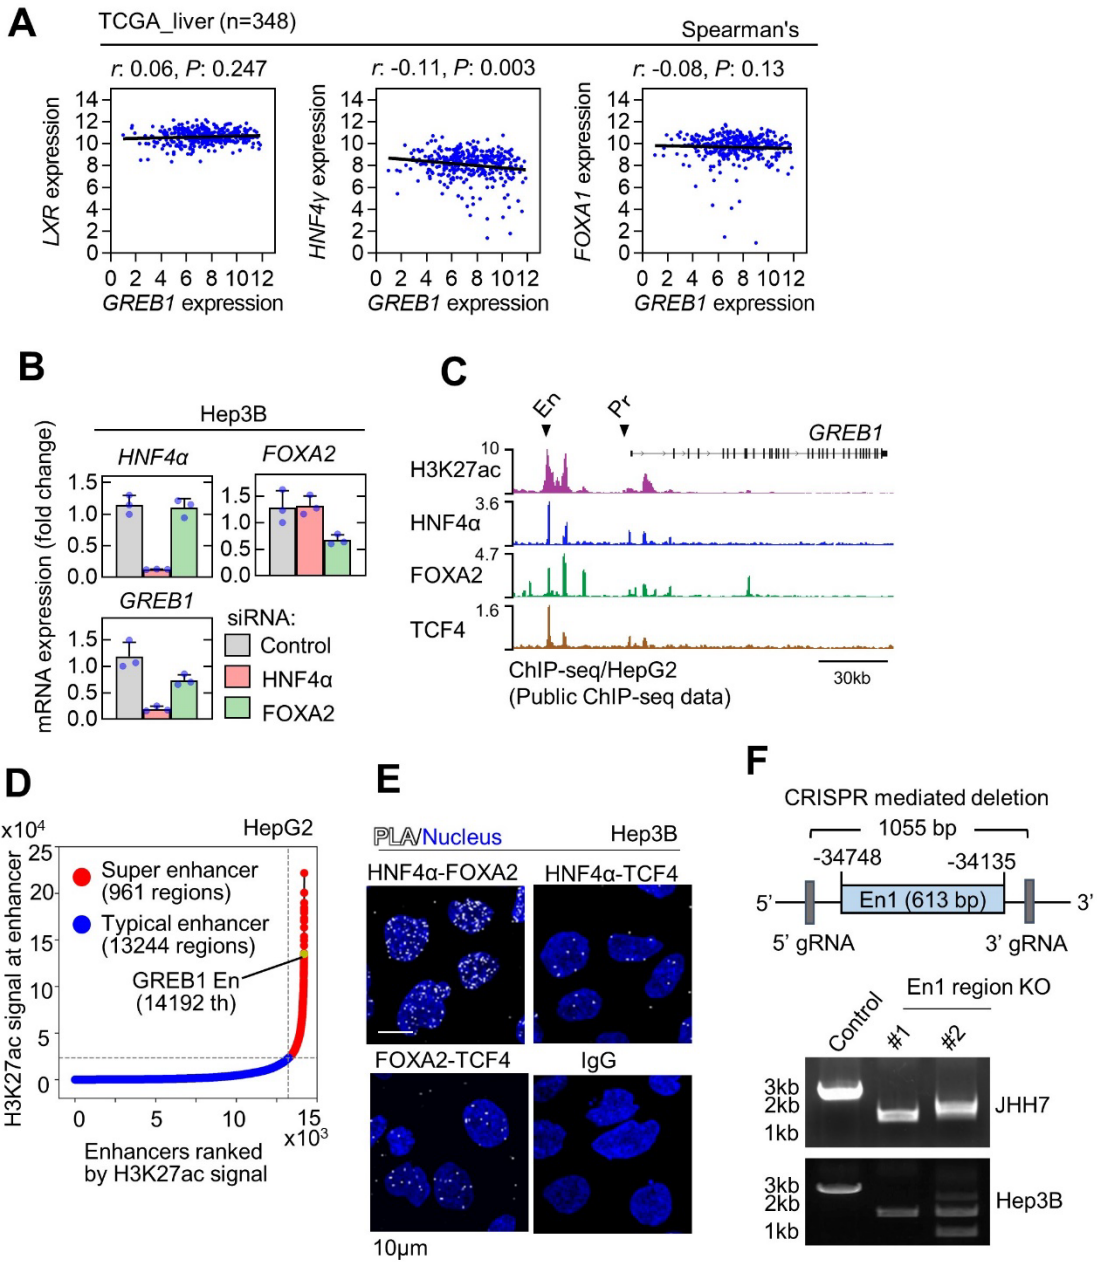

**Supplemental Figure 3| GREB1 expression is regulated in HCC through a super-enhancer involving HNF4 $\alpha$  and FOXA2**

(A) Scatter plots showing the correlation between LXR, HNF4 $\gamma$ , and FOXA1 gene expression (y-axis) and GREB1 gene expression (x-axis) were obtained from a dataset of TCGA HCC patients (n=348). Spearman  $r$  and  $p$  values are calculated using GraphPad Prism.

(B) Hep3B cells were transfected with the indicated siRNAs and mRNA levels of HNF4 $\alpha$ , FOXA2, and GREB1 were measured by real-time PCR. The results are expressed as fold-change of the mRNA levels by HNF4 $\alpha$  and FOXA2 siRNAs compared with those by control siRNA and shown as mean  $\pm$  SD.

(C) All data of ChIP-seq of the *GREB1* locus in HepG2 cells were obtained and visualized using Cistrome Data Browser (<http://cistrome.org/db/#/>). The data shows the binding peaks of H3K27 acetylation (ac) and the indicated transcription factors.

(D) Based on ChIP-seq data of H3K27ac in HepG2 cells, a super-enhancer prediction analysis was performed. 14206 enhancer regions were identified and ranked based on ascending order of the signal intensity of H3K27ac. Super-enhancers were defined as the enhancers above the inflection point of the curve (rank 13245) GREB1 En was predicted as a super-enhancer at rank 14192.

(E) Hep3B cells were incubated with the indicated antibodies, followed by the secondary PLA probe. Interaction events are indicated by white dots.

(F) To generate En1 knockout (KO) cells, gRNAs on the 5'- and 3'-sides of the En1 region were designed (top panel) and introduced into JHH7 and Hep3B cells with Cas9. The deletion of the En1 region was confirmed by PCR using primers flanking the deleted region for the two clones (#1 and #2) (bottom panels).

Matsumoto et al., Supplemental Figure 4

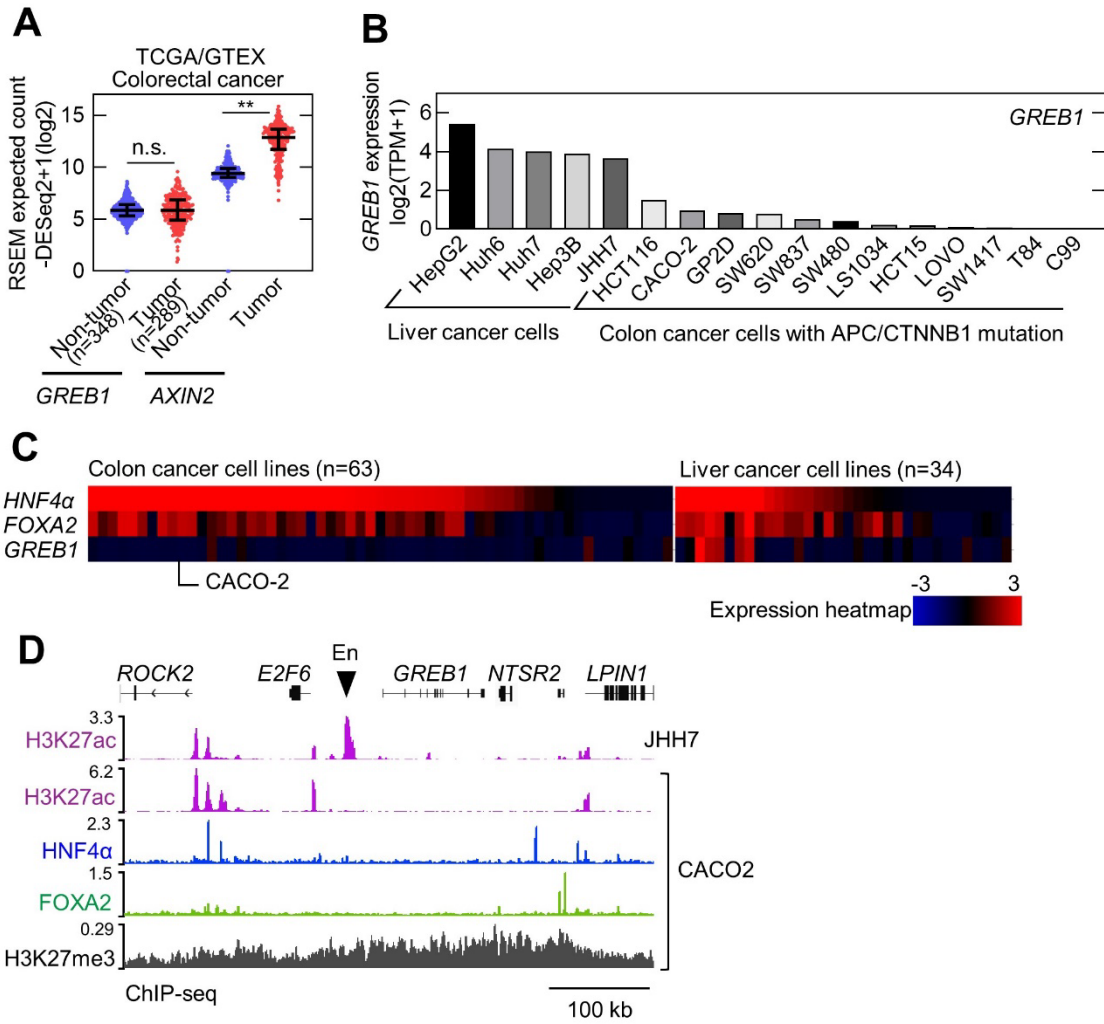

#### **Supplemental Figure 4| GREB1 is not expressed in colorectal cancer**

(A) *GREB1* and *AXIN2* mRNA levels in tumor and non-tumor tissues of colorectal cancer are compared using the UCSC Xena platform for analyzing TCGA TARGET GTEx datasets (<https://xenabrowser.net/>). \*\*,  $P < 0.001$ .

(B) The expression levels of *GREB1* mRNA in 5 liver cancer and 12 colorectal cancer cell lines harboring the mutation in *APC* or *CTNNB1* are shown. Expression data are obtained from DepMap portal (<https://depmap.org/portal/>).

(C) Heat maps showing mRNA expression of *HNF4α*, *FOXA2*, and *GREB1* in human colon cancer (n=63) and liver cancer (n=34) cell lines were obtained from cBioPortal. The heatmaps were sorted in descending order based on *HNF4α* expression per cell line. The location of the expression data for CACO-2 cells is indicated.

(D) ChIP-seq analysis was performed using H3K27 trimethylation (me3), H3K27 acetylation (ac), HNF4α and FOXA2 antibodies in CACO-2 cells, and profile of the *GREB1* and the surrounding locus are shown. All ChIP-seq data are obtained using Cistrome Data Browser (<http://cistrome.org/db/#/>) and visualized. En and Pr represent regions as described in Fig. 2D.

Matsumoto et al., Supplemental Figure 5

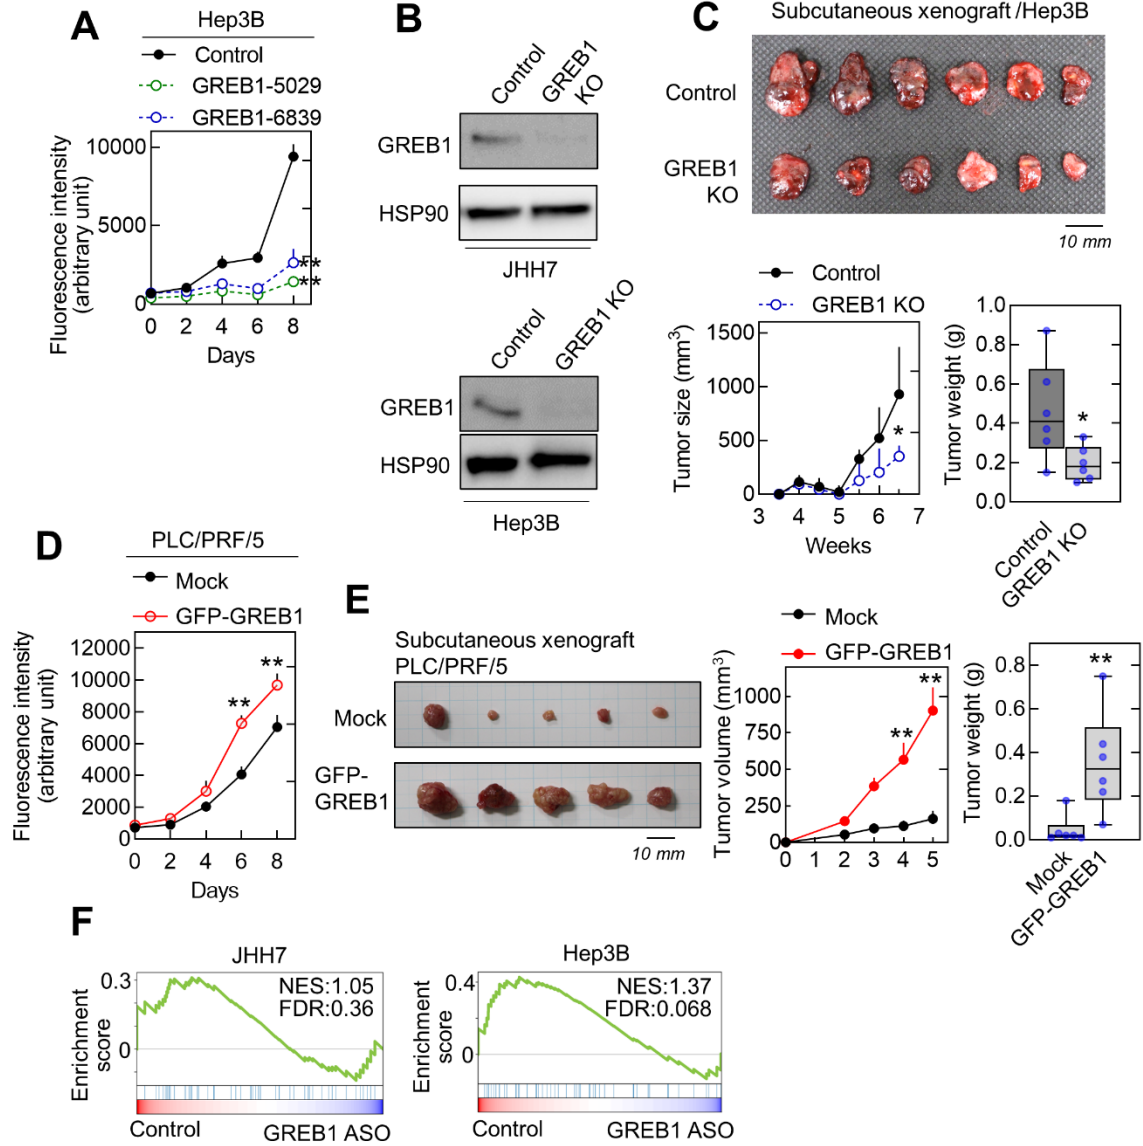



## **Supplemental Figure 5| GREB1 expressed in HCC is involved in cell proliferation and tumorigenesis**

(A) Hep3B cells stably expressing control or GREB1 shRNAs were subjected to a 2D cell proliferation assay. Relative cell numbers were quantified using the CyQUANT assay. Results are expressed as an arbitrary unit and shown as mean  $\pm$  SD. \*\*,  $P < 0.01$ .

(B) Control and GREB1 knockout (KO) cells were generated in JHH7 (top panels) and Hep3B (bottom panels) cells. Whole cell lysates were probed with the indicated antibodies. HSP90 is used as a loading control.

(C) Control or GREB1 KO Hep3B cells were subcutaneously implanted into nude mice ( $n = 6$ ), and the mice were euthanized after 6.5 weeks. Representative appearances of extirpated xenograft tumors are shown (top panel). The sizes and weights (bottom panels) of the xenograft tumors were measured. Results are shown as mean  $\pm$  SD. \*,  $P < 0.05$ .

(D) PLC/PRF/5 cells stably expressing control vector or GFP-GREB1 were subjected to a 2D cell proliferation assay. Relative cell numbers were quantified using the CyQUANT assay. Results are expressed in arbitrary units and expressed as mean  $\pm$  SD. \*\*,  $P < 0.01$ .

(E) PLC/PRF/5 cells stably expressing mock or GFP-GREB1 were subcutaneously transplanted into nude mice ( $n = 6$ ) and mice were euthanized after 5 weeks.

Representative appearances of extirpated xenograft tumors are shown (left panel). The size (middle panel) and weight (right panel) of the xenograft tumors were measured. Results are shown as mean  $\pm$  SD. \*\*,  $P < 0.01$ .

(F) GSEA plots show the enrichment of the TGF- $\beta$  signaling genes from HALLMARK between the control and GREB1 ASO-treated JHH7 (top panel) and Hep3B (bottom panel) cells. NES, normalized enrichment score.

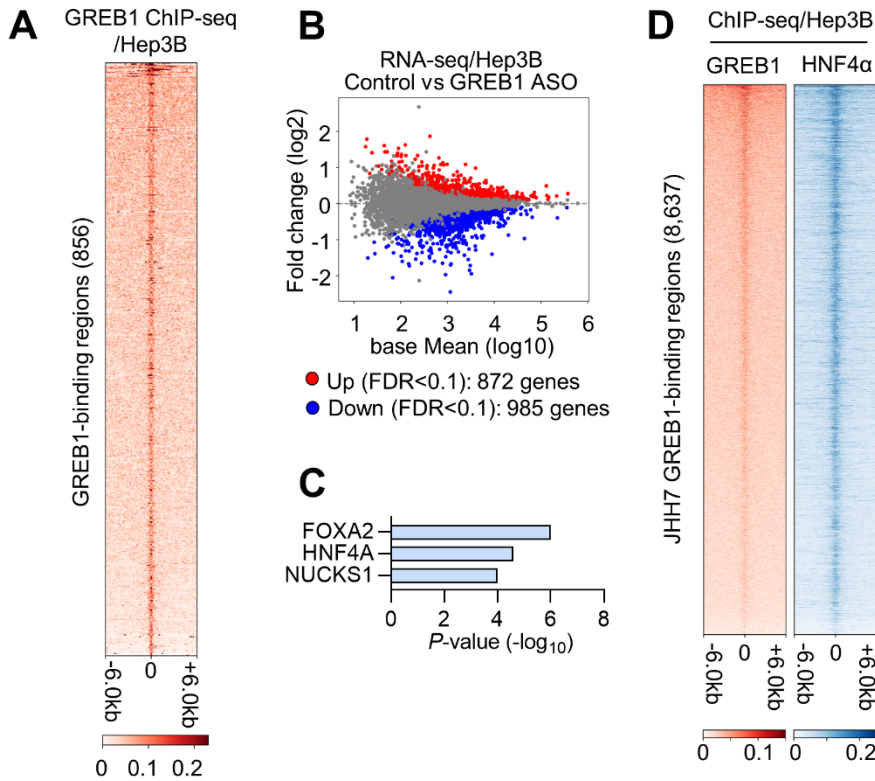

**Supplemental Figure 6 | GREB1 cooperates with HNF4α to regulate gene expression in Hep3B cells.**

(A) ChIP-seq analysis was performed on Hep3B cells using anti-GREB1 antibody. Peak signals in the 856 GREB1 binding regions are shown in a range  $\pm$  6 kb from the peak center.

(B) Total RNA was extracted from Hep3B cells transfected with control or GREB1 ASO, and RNA sequencing analysis was performed. GREB1 knockdown resulted in significantly increased expression of 872 genes and decreased expression of 985 genes in Hep3B cells (FDR < 0.1). The MA plot for differential expression analysis between control (n = 2) and GREB1 (n = 2) ASO-treated samples is shown. The red dots indicate significantly upregulated genes, and the blue dots represent the downregulated genes in the GREB1 ASO-treated cells. FDR, false discovery rate.

(C) ChEA was performed on the GREB1 target genes in Hep3B. The top three significantly enriched terms for ChEA are listed based on their P-values.

(D) ChIP-seq analysis was performed on Hep3B cells using anti-GREB1 and anti-HNF4α antibodies. Peak signals in the 8637 GREB1 binding regions defined in JHH7 cells (Fig. 4A) are shown in a range  $\pm$  6 kb from the peak center.

Matsumoto et al., Supplemental Figure 7

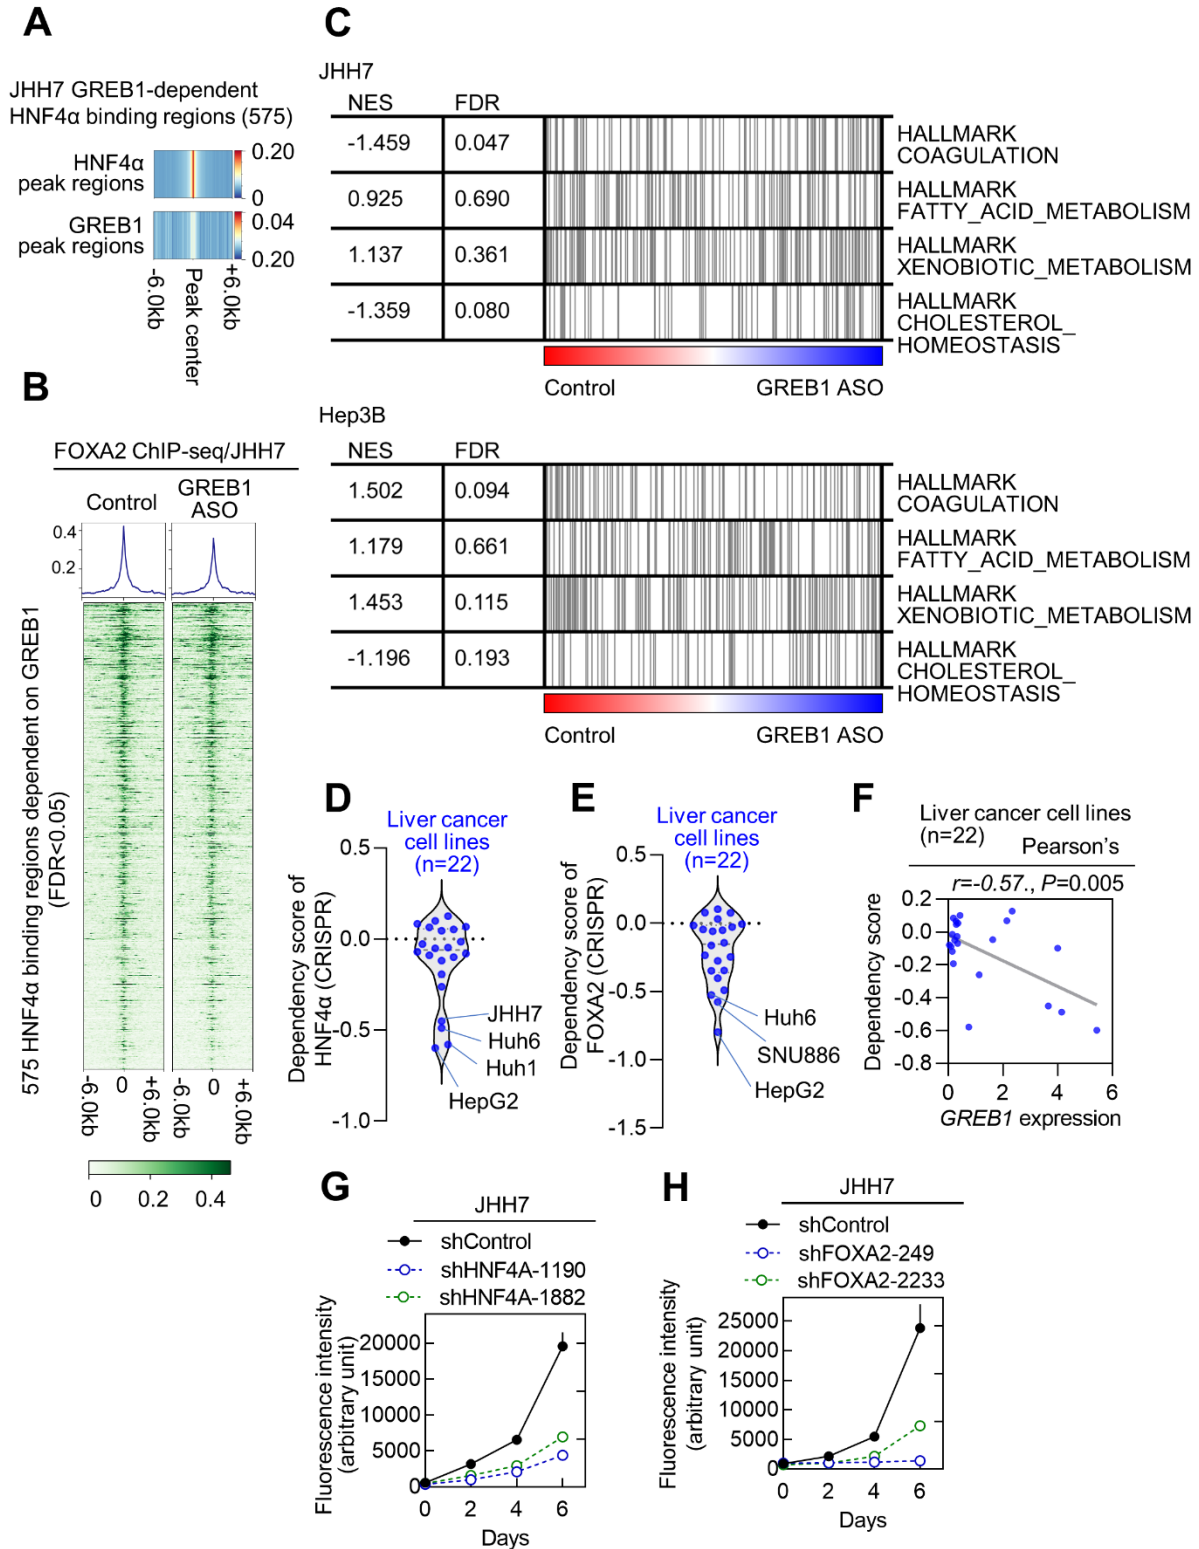

**Supplemental Figure 7| HNF4 $\alpha$  and FOXA2 is involved in cell proliferation in liver cancer cells**

(A) The average Hep3B ChIP-seq signal for HNF4 $\alpha$  and GREB1 in the GREB1-dependent HNF4 $\alpha$  binding regions in JHH7 cells which was identified in Fig. 5B is visualized in the heatmap.

(B) ChIP-seq was performed using anti-FOXA2 antibody in JHH7 cells treated with control or GREB1 ASO. The FOXA2 signal for the 575 regions described in Fig. 5B is shown in a range of  $\pm 6$  kb from the peak center. Heatmaps are sorted in descending order by intensity of the HNF4 $\alpha$  peak signal in control ASO-treated condition.

(C) Enrichment score of the indicated gene sets between the control and GREB1 ASO-treated JHH7 (top panel) and Hep3B (bottom panel) cells was calculated by GSEA. Barcode plot shows the enrichment of each gene sets. Each vertical line in the plot represents a gene in the gene set.

(D) Dependency scores for HNF4 $\alpha$  in the liver cancer cell lines were obtained from DepMap and are shown by dot-and-box plots. Negative scores indicate that deletion of HNF4 $\alpha$  suppressed cell proliferation.

(E) Dependency scores for FOXA2 in the liver cancer cell lines were obtained from DepMap and are shown by dot-and-box plots. Negative scores indicate that deletion of FOXA2 suppressed cell proliferation.

(F) Scatter plots showing the correlation between the HNF4 $\alpha$  dependency score (y-axis) and GREB1 expression (x-axis) were obtained from the DepMap portal (n = 22). The Pearson r- and P-values were calculated with GraphPad Prism.

(G) JHH7 cells stably expressing control or HNF4 $\alpha$  shRNA were cultured in 2D plastic dishes for the indicated number of days. Relative cell numbers were quantified using the CyQUANT assay. The results are presented as the mean  $\pm$  SD.

(H) JHH7 cells stably expressing control or FOXA2 shRNA were cultured in 2D plastic dishes for the indicated number of days. Relative cell numbers were quantified using the CyQUANT assay. The results are presented as the mean  $\pm$  SD.

## Matsumoto et al., Supplemental Figure 8

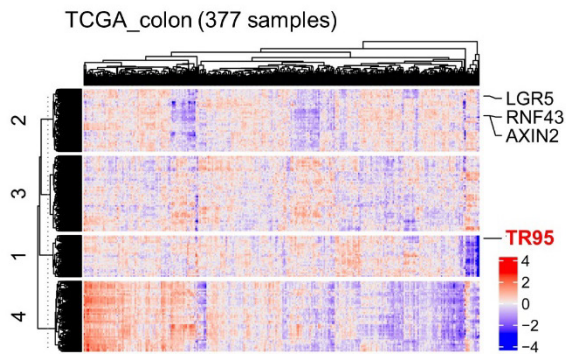

### Supplemental Figure 8 | Expression profile of TR95 genes is different from Wnt/ $\beta$ -catenin target gene in colon cancer

Heatmap was built for highly variable and/or cancer-interesting genes (3516 genes) across TCGA COAD samples, and TR95 signature score. Z-score was calculated for each row (gene) and k-mean clustering (k=4) was performed on genes.

## Supplemental Table 1

| Wnt target | Gene        | Count |
|------------|-------------|-------|
| ○          | AXIN2       | 33    |
| ○          | NKD1        | 20    |
| ○          | ZNRF3       | 18    |
| ○          | NOTUM       | 14    |
| ○          | SP5         | 13    |
| ○          | RNF43       | 13    |
| ○          | APCDD1      | 13    |
| ○          | BMP4        | 12    |
|            | ASPSCR1     | 10    |
|            | TSPOAP1-AS1 | 9     |
|            | ABHD12B     | 9     |
| ○          | BAMBI       | 9     |
|            | FGF3        | 8     |
|            | HUNK        | 8     |
|            | LY6G6F      | 8     |
| ○          | DKK4        | 8     |
| ○          | TNFRSF19    | 8     |
| ○          | MSX2        | 8     |
| ○          | TCF7        | 8     |
|            | MYH7B       | 7     |

### Supplemental Table 1: Candidates of general Wnt target genes.

The “count” column shows the number of tumors where the expression of indicated gene correlates significantly with *AXIN2* in 33 TCGA tumors. Genes were sorted in descending order by the count. The open circle in the “Wnt target” column shows that the indicated gene has been previously reported as a Wnt target gene.

## Supplemental Table 2

Candidates of HCC-specific Wnt target genes

| Rank | Genes   | LIHC   | COAD   | difference | Rank | Genes    | LIHC   | COAD   | difference |
|------|---------|--------|--------|------------|------|----------|--------|--------|------------|
| 1    | MAP3K8  | 0.8286 | 0      | 0.8286     | 25   | FBXO31   | 0.6696 | 0.257  | 0.4126     |
| 2    | RHBG    | 0.8255 | 0      | 0.8255     | 26   | LGR5     | 0.649  | 0.2365 | 0.4125     |
| 3    | GLUL    | 0.8041 | 0      | 0.8041     | 27   | PARD3B   | 0.5321 | 0.1505 | 0.3816     |
| 4    | TMEM245 | 0.7145 | 0      | 0.7145     | 28   | PHYHIPL  | 0.6562 | 0.2766 | 0.3796     |
| 5    | TRIB2   | 0.6948 | 0      | 0.6948     | 29   | HABP4    | 0.5627 | 0.2004 | 0.3623     |
| 6    | PANX1   | 0.6825 | 0      | 0.6825     | 30   | ROCK2    | 0.4717 | 0.1285 | 0.3432     |
| 7    | CPPED1  | 0.83   | 0.1534 | 0.6766     | 31   | SMYD2    | 0.5947 | 0.255  | 0.3397     |
| 8    | INSIG2  | 0.6755 | 0      | 0.6755     | 32   | NEK3     | 0.6275 | 0.2922 | 0.3353     |
| 9    | GREB1   | 0.6454 | 0      | 0.6454     | 33   | CYB5B    | 0.5594 | 0.2263 | 0.3331     |
| 10   | FOXRED2 | 0.6397 | 0      | 0.6397     | 34   | TBX3     | 0.4619 | 0.1564 | 0.3055     |
| 11   | CDK6    | 0.6204 | 0      | 0.6204     | 35   | PREB     | 0.5984 | 0.2976 | 0.3008     |
| 12   | GNAI1   | 0.612  | 0      | 0.612      | 36   | AMACR    | 0.5974 | 0.3106 | 0.2868     |
| 13   | FAM8A1  | 0.6007 | 0      | 0.6007     | 37   | WASHC3   | 0.6548 | 0.3804 | 0.2744     |
| 14   | HLF     | 0.7961 | 0.1957 | 0.6004     | 38   | TMEM150C | 0.6423 | 0.3754 | 0.2669     |
| 15   | GLT8D1  | 0.5959 | 0      | 0.5959     | 39   | HSDL1    | 0.4161 | 0.1661 | 0.25       |
| 16   | PRKAA2  | 0.5952 | 0      | 0.5952     | 40   | ZNF503   | 0.4547 | 0.2366 | 0.2181     |
| 17   | MINPP1  | 0.5913 | 0      | 0.5913     | 41   | TNFRSF19 | 0.4253 | 0.225  | 0.2003     |
| 18   | ACSS3   | 0.5662 | 0      | 0.5662     | 42   | SLC22A11 | 0.4668 | 0.2815 | 0.1853     |
| 19   | ITGA6   | 0.6679 | 0.1556 | 0.5123     | 43   | ACSL5    | 0.465  | 0.2894 | 0.1756     |
| 20   | UGGT1   | 0.6279 | 0.1284 | 0.4995     | 44   | TCF7     | 0.4896 | 0.384  | 0.1056     |
| 21   | GRK3    | 0.7159 | 0.2274 | 0.4885     | 45   | TSC22D1  | 0.4369 | 0.3314 | 0.1055     |
| 22   | STARD13 | 0.6869 | 0.1987 | 0.4882     | 46   | ASPSCR1  | 0.3805 | 0.3366 | 0.0439     |
| 23   | TMCC1   | 0.6127 | 0.1367 | 0.476      |      |          |        |        |            |
| 24   | ITPR2   | 0.5537 | 0.1187 | 0.435      |      |          |        |        |            |

### Supplemental Table 2: Rank of candidates of HCC-specific Wnt signaling target gene.

Table shows 46 candidates of HCC-specific Wnt signaling target genes ranked by the difference of specificity score between HCC and colon cancer.

### Supplemental Table 3

| Rank | Term                                    | P-value  |
|------|-----------------------------------------|----------|
| 1    | HNF4A 19822575 ChIP-Seq HepG2 Human     | 4.99E-26 |
| 2    | FOXA2 19822575 ChIP-Seq HepG2 Human     | 1.64E-16 |
| 3    | LXR 22158963 ChIP-Seq LIVER Mouse       | 1.03E-06 |
| 4    | CTNNB1 20460455 ChIP-Seq HCT116 Human   | 6.39E-06 |
| 5    | PPARA 22158963 ChIP-Seq LIVER Mouse     | 1.52E-05 |
| 6    | RXR 22158963 ChIP-Seq LIVER Mouse       | 1.52E-05 |
| 7    | GATA4 25053715 ChIP-Seq YYC3 Human      | 1.52E-05 |
| 8    | SMAD4 21799915 ChIP-Seq A2780 Human     | 1.80E-05 |
| 9    | TCF7L2 21901280 ChIP-Seq H4IIE Rat      | 3.38E-05 |
| 10   | FOXA1 21915096 ChIP-Seq LNCaP-1F5 Human | 3.52E-05 |

#### Supplemental Table 3: Prediction of transcription factors regulating GREB1 expression in HCC by ChEA.

Using Ualcan (<http://ualcan.path.uab.edu/cgi-bin/ualcan-res.pl>), the top 200 genes positively correlated with GREB1 expression were obtained from the TCGA HCC dataset. Using that gene set, ChIP-Enrichment Analysis (ChEA) (<https://maayanlab.cloud/Enrichr/>) analysis was performed to predict upstream regulatory transcription factors. A list of the top 10 significantly enriched transcription factors was presented. Results based on the liver-related ChIP-seq dataset are marked in light blue.



## Supplemental Table 4

GSEA analysis: enriched in Control (FDR<0.01)

| Rank | Hallmark                           | NES  | FDR q-val |
|------|------------------------------------|------|-----------|
| 1    | HALLMARK_MYC_TARGETS_V1            | 2.20 | 0         |
| 2    | HALLMARK_E2F_TARGETS               | 1.88 | 0.0025    |
| 3    | HALLMARK_MYC_TARGETS_V2            | 1.86 | 0.0020    |
| 4    | HALLMARK_UNFOLDED_PROTEIN_RESPONSE | 1.76 | 0.0052    |
| 5    | HALLMARK_G2M_CHECKPOINT            | 1.70 | 0.0070    |
| 6    | HALLMARK_MTORC1_SIGNALING          | 1.67 | 0.0068    |

GSEA analysis: enriched in GREB1 ASO (FDR<0.01)

| Rank | Hallmark                                   | NES   | FDR q-val |
|------|--------------------------------------------|-------|-----------|
| 1    | HALLMARK_INTERFERON_ALPHA_RESPONSE         | -2.80 | 0         |
| 2    | HALLMARK_INTERFERON_GAMMA_RESPONSE         | -2.62 | 0         |
| 3    | HALLMARK_INFLAMMATORY_RESPONSE             | -2.08 | 0         |
| 4    | HALLMARK_TNFA_SIGNALING_VIA_NFKB           | -2.00 | 0         |
| 5    | HALLMARK_ALLOGRAFT_REJECTION               | -1.94 | 0.00017   |
| 6    | HALLMARK_IL6_JAK_STAT3_SIGNALING           | -1.69 | 0.0055    |
| 7    | HALLMARK_MYOGENESIS                        | -1.69 | 0.0048    |
| 8    | HALLMARK_APICAL_JUNCTION                   | -1.63 | 0.0086    |
| 9    | HALLMARK_COMPLEMENT                        | -1.61 | 0.0098    |
| 10   | HALLMARK_APICAL_SURFACE                    | -1.49 | 0.035     |
| 11   | HALLMARK_CHOLESTEROL_HOMEOSTASIS           | -1.41 | 0.059     |
| 12   | HALLMARK_COAGULATION                       | -1.41 | 0.056     |
| 13   | HALLMARK_EPITHELIAL_MESENCHYMAL_TRANSITION | -1.39 | 0.060     |
| 14   | HALLMARK_APOPTOSIS                         | -1.37 | 0.071     |

### Supplemental Table 4: Rank of annotation terms that are significantly enriched as a result of GSEA of GREB1 knockdown RNA-seq data.

In JHH7 cells, GREB1 expression was suppressed by antisense oligonucleotides (ASO) to perform RNA-seq analysis and gene set enrichment analysis (GSEA) of its transcriptional profile was conducted. Using the Hallmark gene set, the top ranks of annotation terms with FDR<0.01 are shown in descending order based on absolute values of normalized enrichment score (NES). Fourteen annotation terms were significantly enriched in the control condition and six in the GREB1 knockdown condition.

## Supplemental Table 5

| Term                                             | Overlap  | P-value  |
|--------------------------------------------------|----------|----------|
| HNF4A 19822575 ChIP-Seq HepG2 Human              | 447/6083 | 1.49E-52 |
| FOXA2 19822575 ChIP-Seq HepG2 Human              | 248/2968 | 1.93E-32 |
| CREM 20920259 ChIP-Seq GC1-SPG Mouse             | 367/5776 | 1.99E-25 |
| KDM5B 21448134 ChIP-Seq MESC's Mouse             | 261/3724 | 2.78E-22 |
| ZNF217 24962896 ChIP-Seq MCF-7 Human             | 137/1522 | 7.65E-20 |
| MITF 21258399 ChIP-Seq MELANOMA Human            | 340/5578 | 1.07E-19 |
| LXR 22158963 ChIP-Seq LIVER Mouse                | 163/2000 | 2.59E-19 |
| NUCKS1 24931609 ChIP-Seq HEPATOCYTES Mouse       | 72/588   | 1.99E-17 |
| MYC 19030024 ChIP-ChIP MESC's Mouse              | 243/3868 | 1.59E-14 |
| EKLF 21900194 ChIP-Seq ERYTHROCYTE Mouse         | 103/1239 | 8.95E-13 |
| YAP1 20516196 ChIP-Seq MESC's Mouse              | 161/2329 | 1.25E-12 |
| WT1 25993318 ChIP-Seq PODOCYTE Human             | 216/3464 | 2.05E-12 |
| MYCN 18555785 ChIP-Seq MESC's Mouse              | 156/2261 | 3.61E-12 |
| TFAP2C 20629094 ChIP-Seq MCF-7 Human             | 99/1203  | 4.76E-12 |
| RXR 22158963 ChIP-Seq LIVER Mouse                | 140/2000 | 2.20E-11 |
| E2F1 18555785 ChIP-Seq MESC's Mouse              | 244/4172 | 3.73E-11 |
| SMARCA4 23332759 ChIP-Seq OLIGODENDROCYTES Mouse | 165/2522 | 5.38E-11 |
| PRDM5 23873026 ChIP-Seq MEFs Mouse               | 86/1029  | 6.38E-11 |
| RUNX1 21571218 ChIP-Seq MEGAKARYOCYTES Human     | 283/5071 | 8.44E-11 |
| FLI1 21571218 ChIP-Seq MEGAKARYOCYTES Human      | 316/5834 | 1.09E-10 |

### Supplemental Table 5: Prediction of regulatory transcription factors of GREB1-dependent 800 genes in HCC by ChEA.

A ChIP-Enrichment Analysis (ChEA) (<https://maayanlab.cloud/Enrichr/>) analysis was performed on a set of 800 genes bound and transcriptionally regulated by GREB1 on chromatin to predict regulatory transcription factors. A list of the top 20 significantly enriched transcription factors was presented. Results based on the liver-related ChIP-seq dataset are marked in light blue.

## Supplemental Table 6

MSigDB Hallmark 2020

| Term                              | Overlap | <i>P</i> -value |
|-----------------------------------|---------|-----------------|
| Myc Targets V1                    | 44/200  | 1.06E-20        |
| mTORC1 Signaling                  | 40/200  | 2.21E-17        |
| Unfolded Protein Response         | 22/113  | 6.20E-10        |
| G2-M Checkpoint                   | 29/200  | 1.90E-09        |
| Hypoxia                           | 27/200  | 3.22E-08        |
| E2F Targets                       | 27/200  | 3.22E-08        |
| Mitotic Spindle                   | 26/199  | 1.13E-07        |
| Xenobiotic Metabolism             | 24/200  | 1.64E-06        |
| Oxidative Phosphorylation         | 21/200  | 5.48E-05        |
| Glycolysis                        | 21/200  | 5.48E-05        |
| Myc Targets V2                    | 10/58   | 9.06E-05        |
| IL-2/STAT5 Signaling              | 20/199  | 1.49E-04        |
| Adipogenesis                      | 20/200  | 1.60E-04        |
| UV Response Dn                    | 16/144  | 2.14E-04        |
| Fatty Acid Metabolism             | 16/158  | 6.11E-04        |
| Estrogen Response Early           | 18/200  | 0.001161        |
| Cholesterol Homeostasis           | 9/74    | 0.002705        |
| Epithelial Mesenchymal Transition | 17/200  | 0.002878        |
| PI3K/AKT/mTOR Signaling           | 11/105  | 0.003196        |
| UV Response Up                    | 14/158  | 0.004509        |

### Supplemental Table 6: List of the top 20 annotated terms significantly enriched by pathway analysis of GREB1-dependent 800 genes.

Pathway analysis (<https://maayanlab.cloud/Enrichr/>) was performed on a set of 800 GREB1-dependent genes that are bound and transcriptionally regulated by GREB1 on chromatin. A list of the top 20 significantly enriched annotation terms from the analysis using the Hallmark gene set is shown.

## Supplemental Table 7

| Rank | Term                                         | p-value  |
|------|----------------------------------------------|----------|
| 1    | ZNF217 24962896 ChIP-Seq MCF7 Human          | 3.50E-11 |
| 2    | SMAD4 21799915 ChIP-Seq A2780 Human          | 6.74E-09 |
| 3    | WT1 25993318 ChIP-Seq PODOCYTE Human         | 4.00E-08 |
| 4    | RUNX2 22187159 ChIP-Seq PCA Human            | 7.09E-07 |
| 5    | STAT3 23295773 ChIP-Seq U87 Human            | 7.44E-07 |
| 6    | FOXA2 19822575 ChIP-Seq HepG2 Human          | 1.07E-06 |
| 7    | PPARD 21283829 ChIP-Seq MYOFIBROBLAST Human  | 3.42E-06 |
| 8    | NR3C1 21868756 ChIP-Seq MCF10A Human         | 2.07E-05 |
| 9    | HNF4A 19822575 ChIP-Seq HepG2 Human          | 2.40E-05 |
| 10   | ESR2 21235772 ChIP-Seq MCF-7 Human           | 9.48E-05 |
| 11   | NUCKS1 24931609 ChIP-Seq HEPATOCYTES Mouse   | 1.11E-04 |
| 12   | EGR1 20690147 ChIP-Seq ERYTHROLEUKEMIA Human | 1.16E-04 |
| 13   | SOX2 21211035 ChIP-Seq LN229 Gbm             | 1.47E-04 |
| 14   | AR 22383394 ChIP-Seq PROSTATE CANCER Human   | 1.61E-04 |
| 15   | VDR 24787735 ChIP-Seq THP-1 Human            | 1.76E-04 |

### Supplemental Table 7: Prediction of regulatory transcription factors of GREB1-dependent genes in Hep3B cells by ChEA.

To predict regulatory transcription factors, ChIP-Enrichment Analysis (ChEA) (<https://maayanlab.cloud/Enrichr/>) analysis was performed on a set of genes whose regulatory regions are occupied by GREB1 (identified by ChIP-seq) and whose expression are regulated by GREB1 (identified by RNA-seq). A list of the top 15 significantly enriched transcription factors was presented. Results based on the liver-related ChIP-seq dataset are marked in light blue.

## Supplemental Table 8

| Rank | Terms                                                  | Known motif       | P-value  |
|------|--------------------------------------------------------|-------------------|----------|
| 1    | RAR:RXR(NR),DR0/ES-RAR-ChIP-Seq(GSE56893)              | AGGTCAAGGTCA      | 1.00E-38 |
| 2    | COUP-TFII(NR)/K562-NR2F1-ChIP-Seq(Encode)              | GKBCARAGGTCA      | 1.00E-26 |
| 3    | HNF4a(NR),DR1/HepG2-HNF4a-ChIP-Seq(GSE25021)           | CARRGKBCAAAGTYCA  | 1.00E-26 |
| 4    | RARa(NR)/K562-RARa-ChIP-Seq(Encode)                    | TTGAMCTTTG        | 1.00E-23 |
| 5    | RARg(NR)/ES-RARg-ChIP-Seq(GSE30538)                    | AGGTCAAGGTCA      | 1.00E-22 |
| 6    | EAR2(NR)/K562-NR2F6-ChIP-Seq(Encode)                   | NRBCARRGGTCA      | 1.00E-22 |
| 7    | COUP-TFII(NR)/Artia-Nr2f2-ChIP-Seq(GSE46497)           | AGRGGTCA          | 1.00E-22 |
| 8    | Foxa3(Forkhead)/Liver-Foxa3-ChIP-Seq(GSE77670)         | BSNTGTTTACWYWGN   | 1.00E-22 |
| 9    | Foxa2(Forkhead)/Liver-Foxa2-ChIP-Seq(GSE25694)         | CYTGTTTACWYW      | 1.00E-22 |
| 10   | Elk4(ETS)/Hela-Elk4-ChIP-Seq(GSE31477)                 | NRYTTCCGGY        | 1.00E-20 |
| 11   | CEBP:AP1(bZIP)/ThioMac-CEBPb-ChIP-Seq(GSE21512)        | DRTGTTGCAA        | 1.00E-20 |
| 12   | Fli1(ETS)/CD8-FLI-ChIP-Seq(GSE20898)                   | NRYTTCCGGH        | 1.00E-20 |
| 13   | ERRg(NR)/Kidney-ESRRG-ChIP-Seq(GSE104905)              | GTGACCTTGRVN      | 1.00E-19 |
| 14   | Esrrb(NR)/mES-Esrrb-ChIP-Seq(GSE11431)                 | KTGACCTTGA        | 1.00E-19 |
| 15   | RORg(NR)/Liver-Rorc-ChIP-Seq(GSE101115)                | WAABTAGGTCAV      | 1.00E-18 |
| 16   | ETV4(ETS)/HepG2-ETV4-ChIP-Seq(ENCODE)                  | ACCGGAAGTG        | 1.00E-18 |
| 17   | Fox:Ebox(Forkhead,bHLH)/Panc1-Foxa2-ChIP-Seq(GSE47459) | NNNVCTGWGYAAACASN | 1.00E-17 |
| 18   | Elk1(ETS)/Hela-Elk1-ChIP-Seq(GSE31477)                 | HACTTCCGGY        | 1.00E-17 |
| 19   | FOXA1(Forkhead)/MCF7-FOXA1-ChIP-Seq(GSE26831)          | WAAGTAAACA        | 1.00E-17 |
| 20   | Erra(NR)/HepG2-Erra-ChIP-Seq(GSE31477)                 | CAAAGGTCAG        | 1E-17    |

### Supplemental Table 8: List of known motif analysis results for GREB1 binding regions identified by ChIP-seq analysis.

HOMER known motif analysis was performed on the 8637 GREB1 binding regions identified. A list of the top 20 significantly enriched binding motifs is shown. Results based on the liver-related ChIP-seq dataset are marked in light blue.

## Supplemental Table 9

GO Biological Process\_2021

| Term                                                                            | P-value  |
|---------------------------------------------------------------------------------|----------|
| positive regulation of cell migration (GO:0030335)                              | 1.61E-06 |
| positive regulation of cellular process (GO:0048522)                            | 1.68E-06 |
| negative regulation of cell differentiation (GO:0045596)                        | 4.03E-06 |
| regulation of cell migration (GO:0030334)                                       | 4.72E-06 |
| regulation of Wnt signaling pathway (GO:0030111)                                | 4.91E-06 |
| positive regulation of cell population proliferation (GO:0008284)               | 5.12E-06 |
| heart development (GO:0007507)                                                  | 7.44E-06 |
| cellular response to glucocorticoid stimulus (GO:0071385)                       | 8.81E-06 |
| cellular protein modification process (GO:0006464)                              | 1.38E-05 |
| positive regulation of intracellular signal transduction (GO:1902533)           | 1.6E-05  |
| organonitrogen compound biosynthetic process (GO:1901566)                       | 1.84E-05 |
| regulation of apoptotic process (GO:0042981)                                    | 2.1E-05  |
| Fc-epsilon receptor signaling pathway (GO:0038095)                              | 2.39E-05 |
| Fc receptor signaling pathway (GO:0038093)                                      | 2.64E-05 |
| negative regulation of cellular macromolecule biosynthetic process (GO:2000113) | 3.93E-05 |
| cellular response to cytokine stimulus (GO:0071345)                             | 4.55E-05 |
| negative regulation of signal transduction (GO:0009968)                         | 4.75E-05 |
| negative regulation of nucleic acid-templated transcription (GO:1903507)        | 5.47E-05 |
| mitochondrial respiratory chain complex assembly (GO:0033108)                   | 6.77E-05 |

### Supplemental Table 9: List of top 20 annotated terms significantly enriched by GO analysis of 590 GREB1-dependent HNF4 $\alpha$ target genes.

Gene Ontology (GO) enrichment analysis was performed on the 590 gene set assigned to 575 HNF4 $\alpha$  binding peaks that were significantly attenuated by GREB1 knockdown (<https://maayanlab.cloud/Enrichr/>). A list of the top 20 annotated terms that were significantly enriched in the analysis using the GO Biological Process\_2021 gene set is shown.

Supplemental Table 10

| No. | Gene symbol | Dependency Score |
|-----|-------------|------------------|
| 1   | GINS1       | -2.35            |
| 2   | SF3B6       | -1.66            |
| 3   | SEC13       | -1.40            |
| 4   | TXN         | -1.37            |
| 5   | PSMG4       | -1.16            |
| 6   | RBMX        | -1.11            |
| 7   | HK2         | -1.04            |
| 8   | HNRNPU      | -1.03            |
| 9   | FARS2       | -0.97            |
| 10  | MRPS23      | -0.89            |
| 11  | CHCHD3      | -0.70            |
| 12  | SLC25A3     | -0.68            |
| 13  | NUP35       | -0.66            |
| 14  | BUD13       | -0.63            |
| 15  | NDUFA10     | -0.54            |
| 16  | AK2         | -0.54            |
| 17  | TBCA        | -0.51            |
| 18  | IGF2        | -0.49            |
| 19  | SCD         | -0.49            |
| 20  | CWF19L2     | -0.43            |
| 21  | MAP4K4      | -0.28            |
| 22  | LIN28B      | -0.28            |
| 23  | SDC1        | -0.24            |
| 24  | ASS1        | -0.21            |
| 25  | RAPGEF1     | -0.20            |
| 26  | DAB1        | -0.20            |
| 27  | DIAPH3      | -0.16            |
| 28  | PUM2        | -0.15            |
| 29  | PRDX6       | -0.13            |
| 30  | MSRB3       | -0.13            |
| 31  | DPYD        | -0.11            |
| 32  | RRAS2       | -0.11            |
| 33  | SNTB1       | -0.10            |
| 34  | FAH         | -0.10            |
| 35  | ACSL4       | -0.08            |
| 36  | CDK14       | -0.08            |
| 37  | PAH         | -0.08            |
| 38  | ANKRD50     | -0.07            |
| 39  | MLLT10      | -0.07            |
| 40  | ARID1B      | -0.06            |
| 41  | KLF15       | -0.06            |
| 42  | GPAM        | -0.06            |
| 43  | GUCY1A2     | -0.06            |
| 44  | PREP        | -0.05            |
| 45  | LPP         | -0.04            |
| 46  | PTDSS1      | -0.04            |
| 47  | MPP6        | -0.04            |
| 48  | CDKAL1      | -0.03            |
| 49  | TBC1D22A    | -0.03            |

| No. | Gene symbol | Dependency score |
|-----|-------------|------------------|
| 50  | CDC42EP1    | -0.03            |
| 51  | NFIA        | -0.03            |
| 52  | ID2         | -0.02            |
| 53  | LMAN1       | -0.02            |
| 54  | MAOB        | -0.02            |
| 55  | ARRDC3      | -0.01            |
| 56  | PLD5        | -0.01            |
| 57  | SDC2        | -0.01            |
| 58  | EXOC2       | -0.01            |
| 59  | IVD         | 0.00             |
| 60  | STT3B       | 0.01             |
| 61  | MGLL        | 0.01             |
| 62  | ACOX2       | 0.01             |
| 63  | PID1        | 0.02             |
| 64  | MAGI1       | 0.02             |
| 65  | SLC22A23    | 0.02             |
| 66  | CYP24A1     | 0.03             |
| 67  | HACD2       | 0.03             |
| 68  | ERI3        | 0.04             |
| 69  | YWHAH       | 0.05             |
| 70  | PARD3       | 0.05             |
| 71  | DUSP9       | 0.05             |
| 72  | FRAS1       | 0.06             |
| 73  | CACUL1      | 0.06             |
| 74  | PRLR        | 0.06             |
| 75  | RAPH1       | 0.06             |
| 76  | PDXP        | 0.08             |
| 77  | GALNT7      | 0.08             |
| 78  | BRD9        | 0.08             |
| 79  | WVVOX       | 0.09             |
| 80  | MAN1A1      | 0.09             |
| 81  | HEG1        | 0.10             |
| 82  | GPC3        | 0.11             |
| 83  | DDAH1       | 0.11             |
| 84  | GMDS        | 0.12             |
| 85  | TGFBR2      | 0.13             |
| 86  | TMEM43      | 0.13             |
| 87  | APOB        | 0.14             |
| 88  | CWC27       | 0.15             |
| 89  | LRIG1       | 0.15             |
| 90  | MACF1       | 0.15             |
| 91  | GALNT2      | 0.20             |
| 92  | RBM26       | 0.21             |
| 93  | ERRFI1      | 0.27             |
| 94  | AKR1C1      | N.A              |
| 95  | SIRPA       | N.A              |

**Supplemental Table 10: List of 95 GREB1-dependent HNF4 $\alpha$  target genes (TR95) and the dependency scores**

A list of the dependency scores for the 95 target genes of HNF4 $\alpha$  (TR95) is shown. Data were obtained from DepMap portal (<https://depmap.org/portal/>).
